# Supplementary material for: The introduction of dengue follows transportation infrastructure changes in the state of Acre, Brazil: A network-based analysis
Source: PubMed Central journal article supplement (PMC5693297; doi:10.1371/journal.pntd.0006070), 2017-11-17
Supplement: pntd.0006070.s003.pdf [file pntd.0006070.s003.pdf]

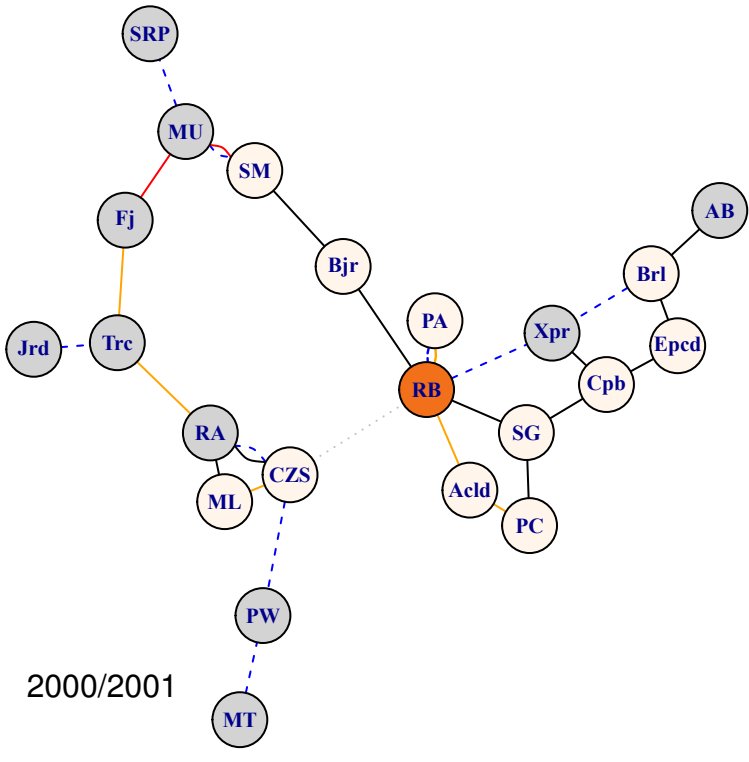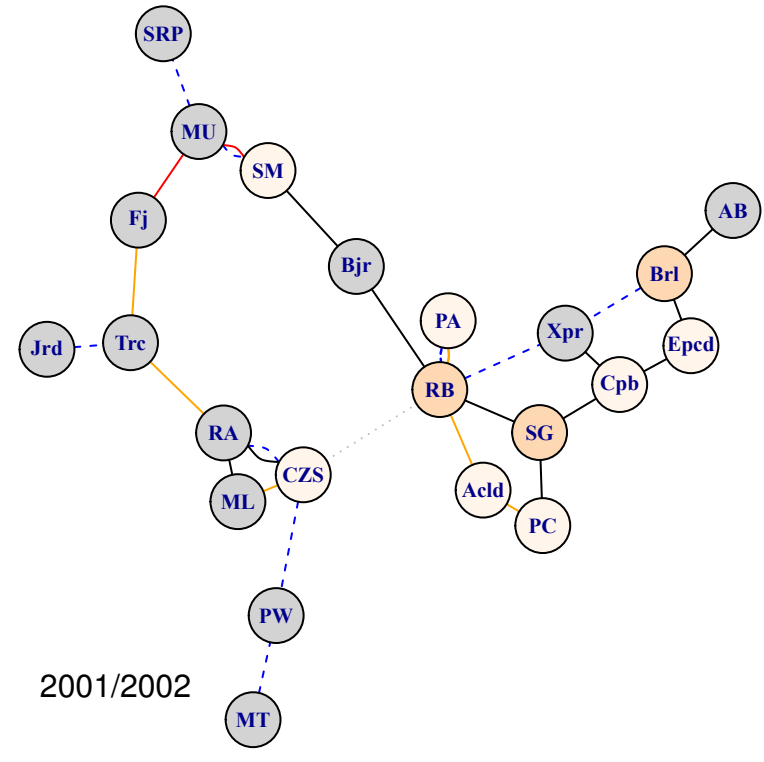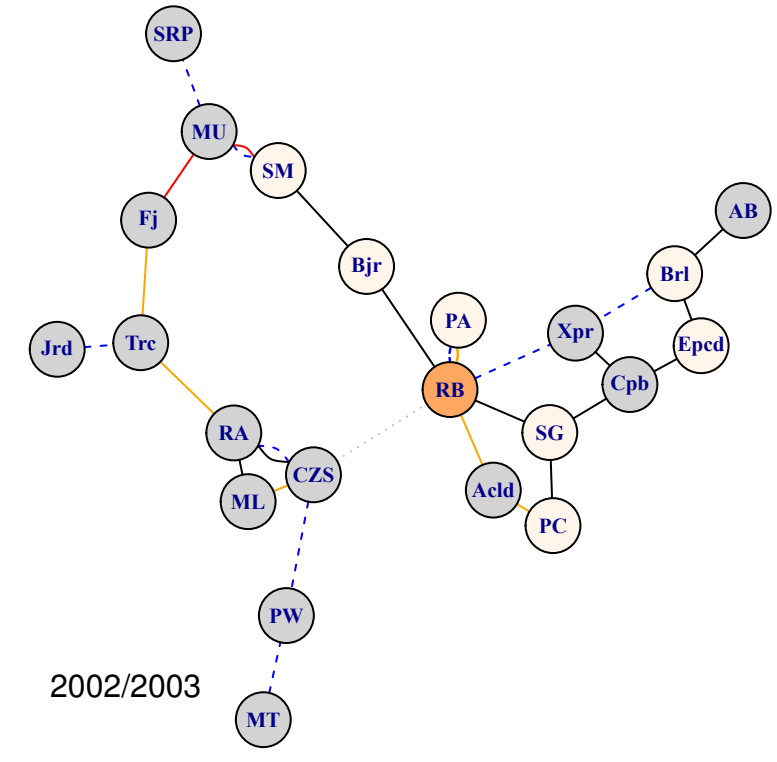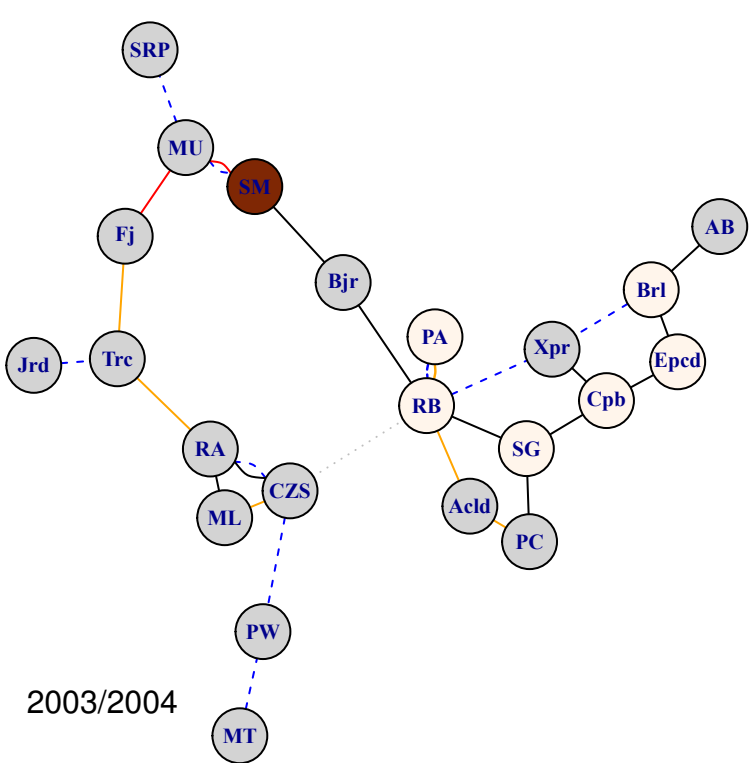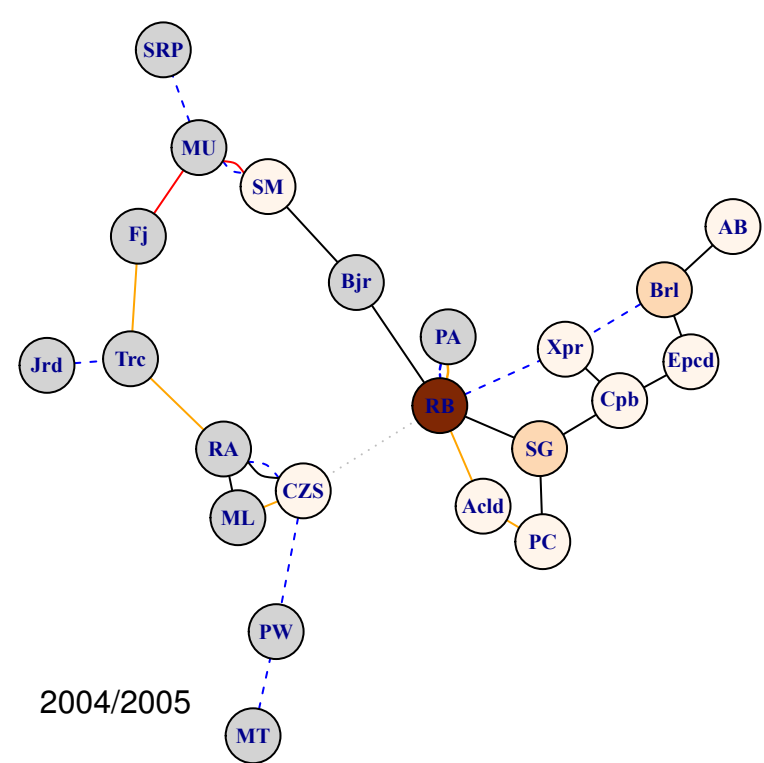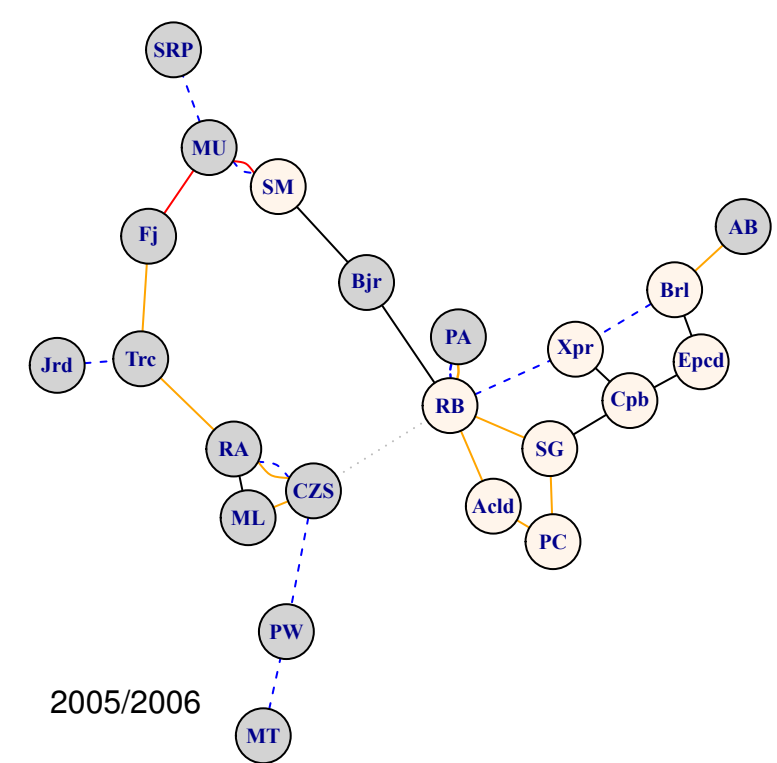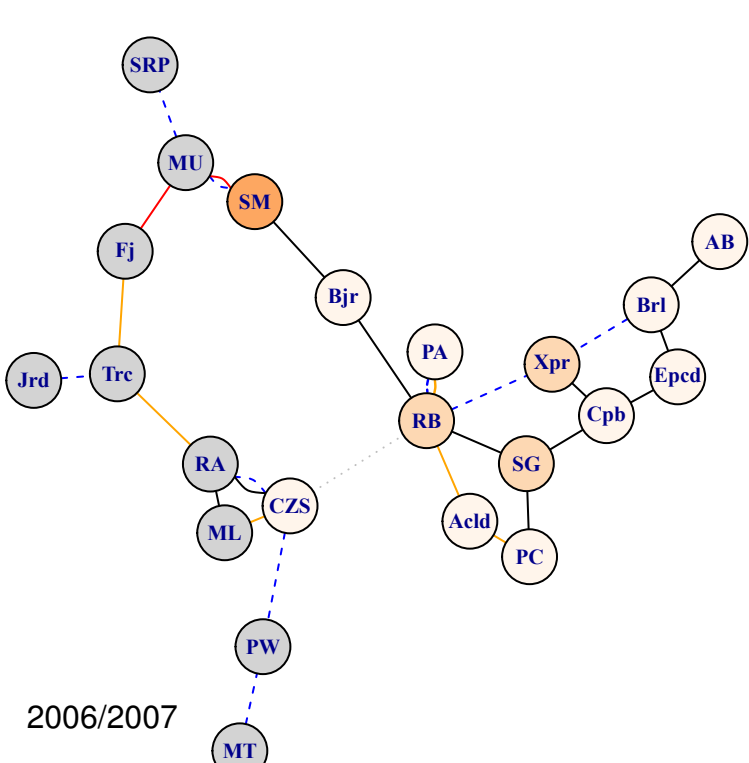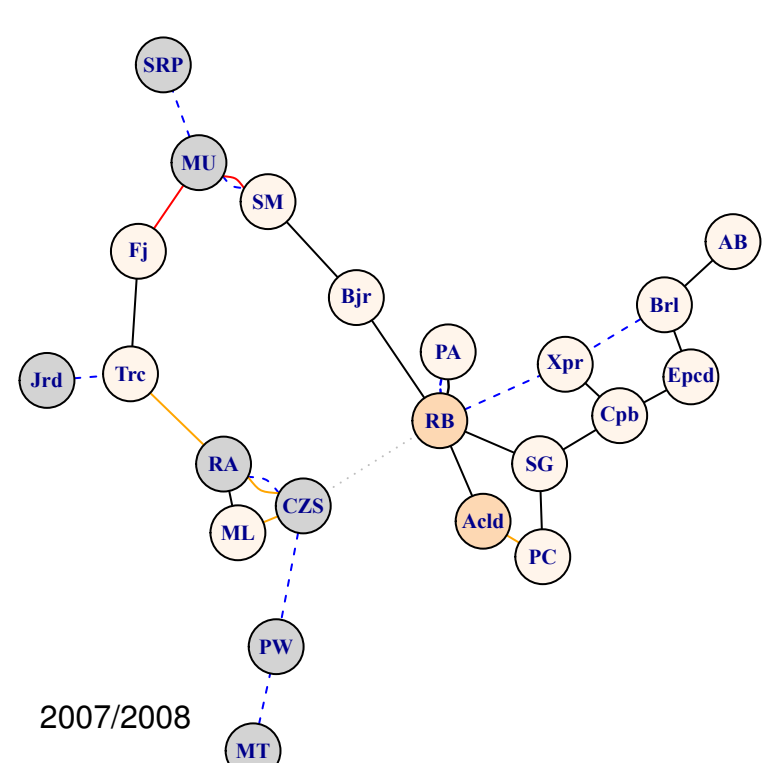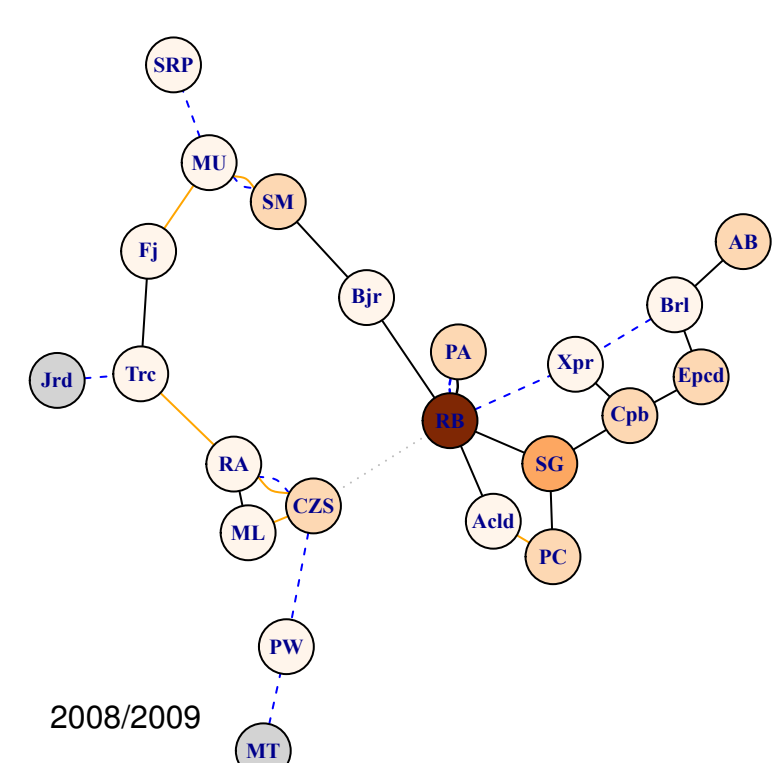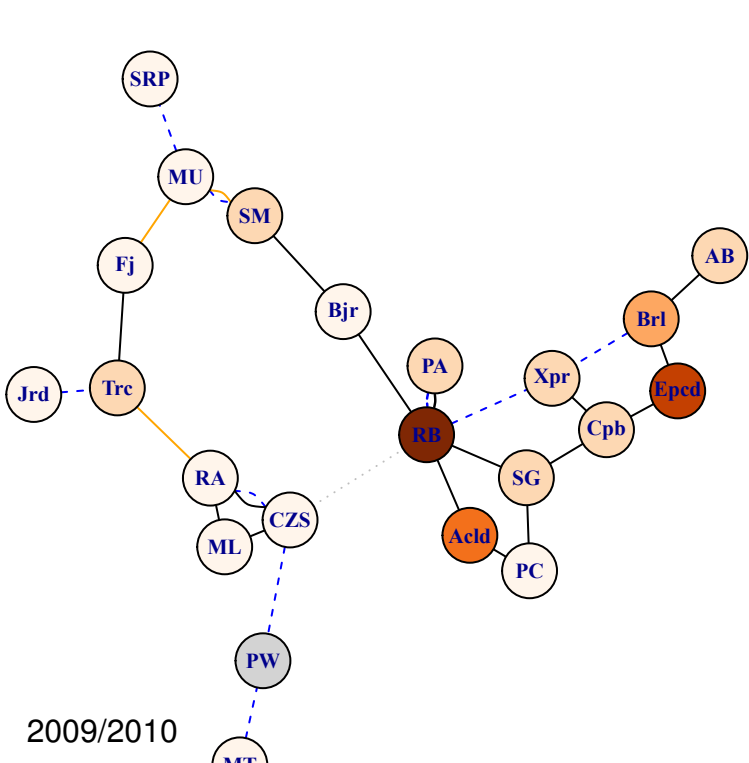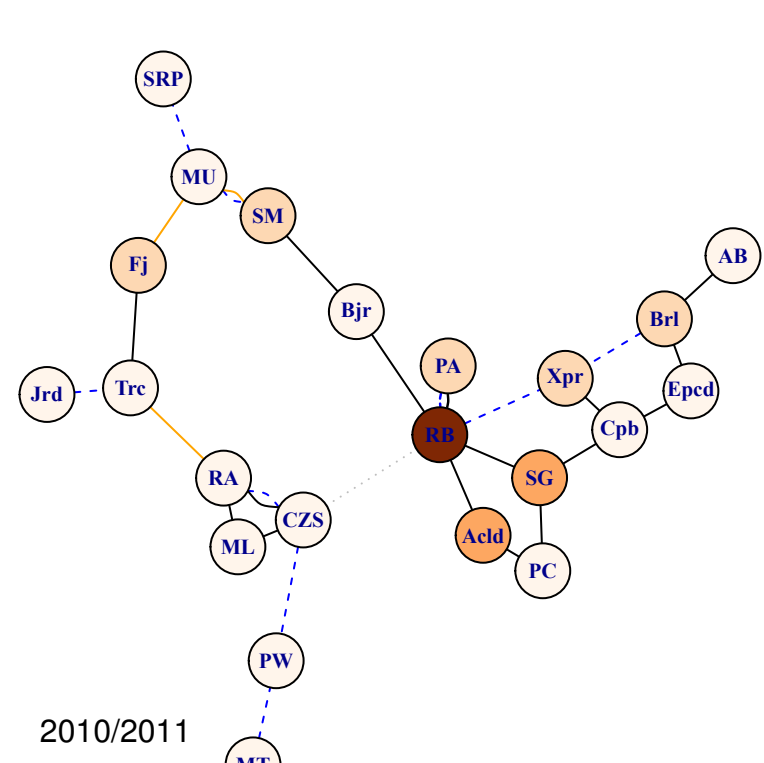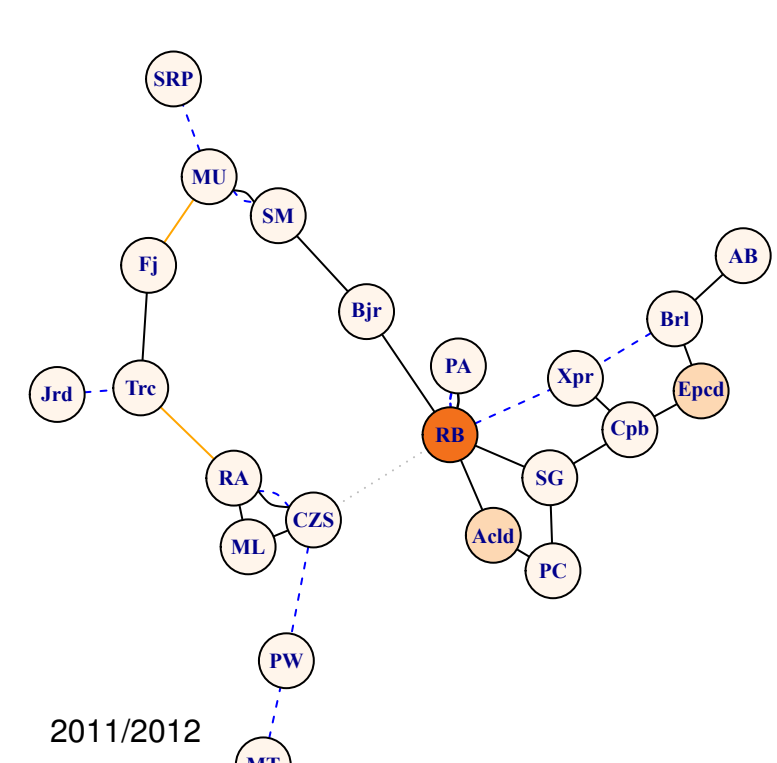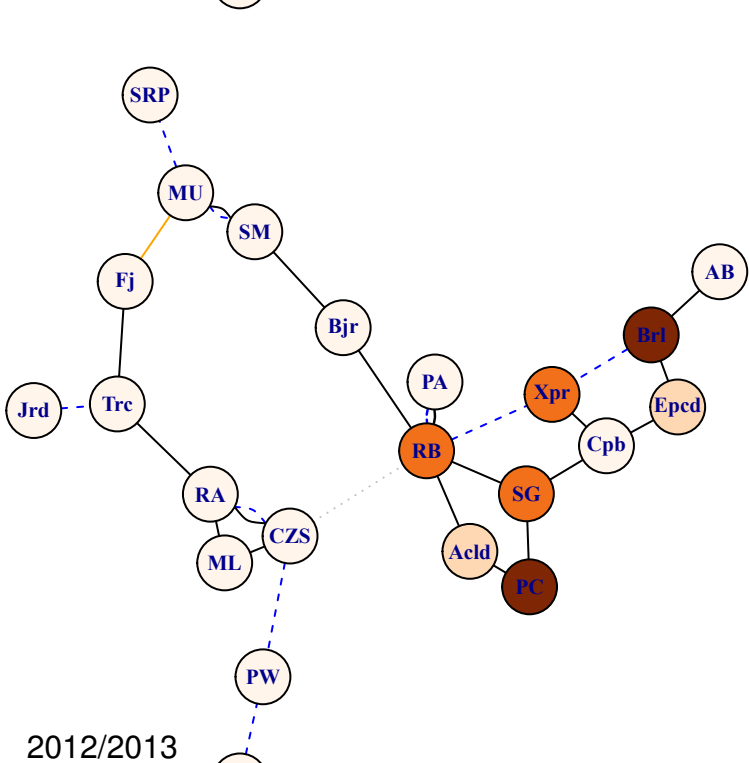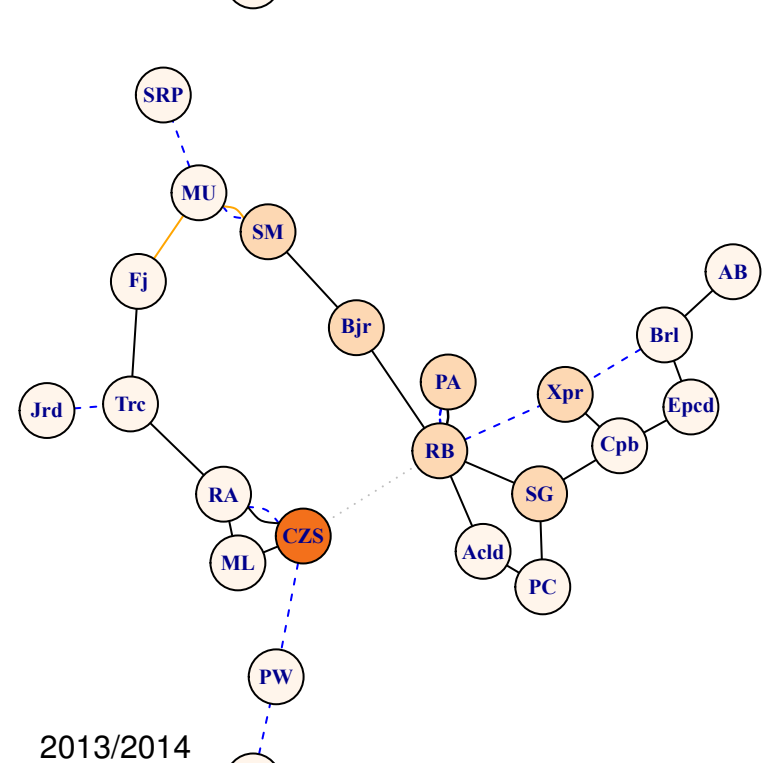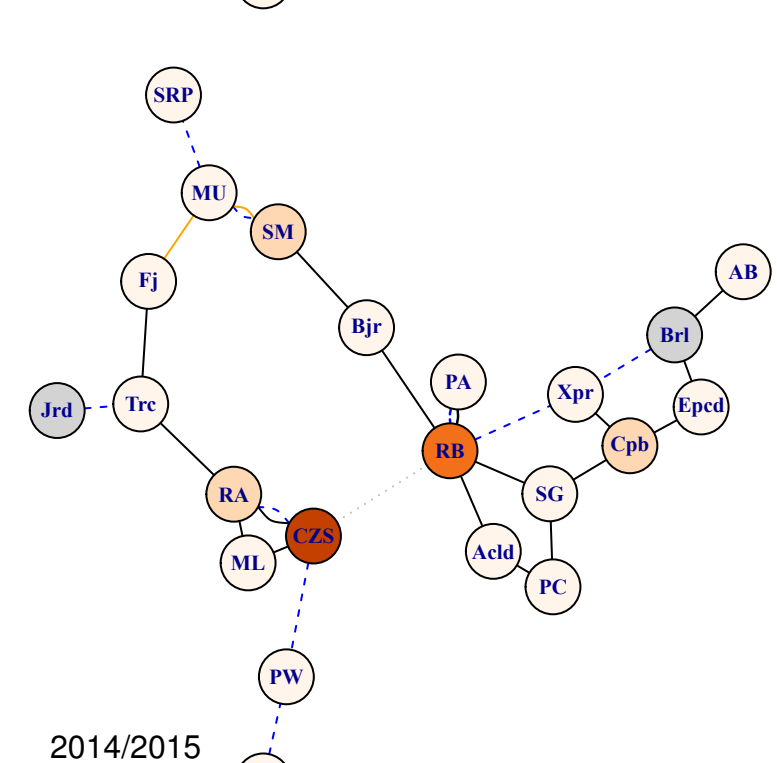

Edges

- Unpaved road
- Paved road
- Road under maintenance
- Watercourse
- Air

Nodes

- Sustained trans. weeks = 0
- Sustained trans. weeks = 1
- Sustained trans. weeks = 2
- Sustained trans. weeks = 3
- Sustained trans. weeks = 4
- Sustained trans. weeks = 5
- Sustained trans. weeks = 6
